# Supplementary material for: Controlling side reactions and self-discharge in high-voltage spinel cathodes: the critical role of surface crystallographic facets
Source: Royal Society of Chemistry journal article supplement (doi:10.1039/c5cp04899k), 2015-01-01
Supplement: c5cp04899k1.pdf [file c5cp04899k1.pdf]

## Supporting information

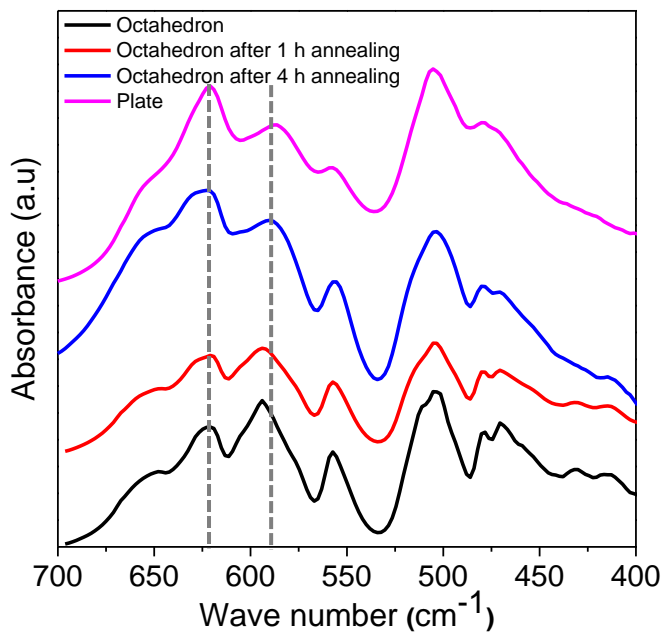

Figure SI-1. FTIR spectra of LMNO samples before and after annealing.

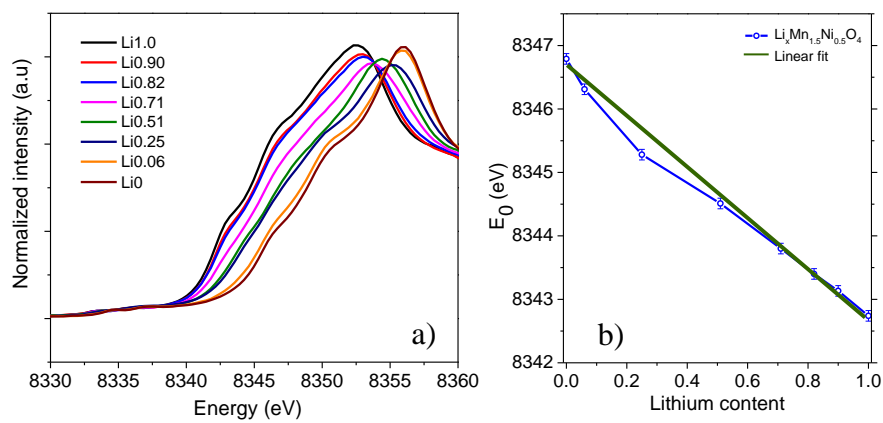

Figure SI-2. a) Ni *K*-edge XANES spectra and b) relationships between  $E_0$  and lithium content in chemically delithiated  $\text{Li}_x\text{MNO}$  samples.  $x$  as indicated.

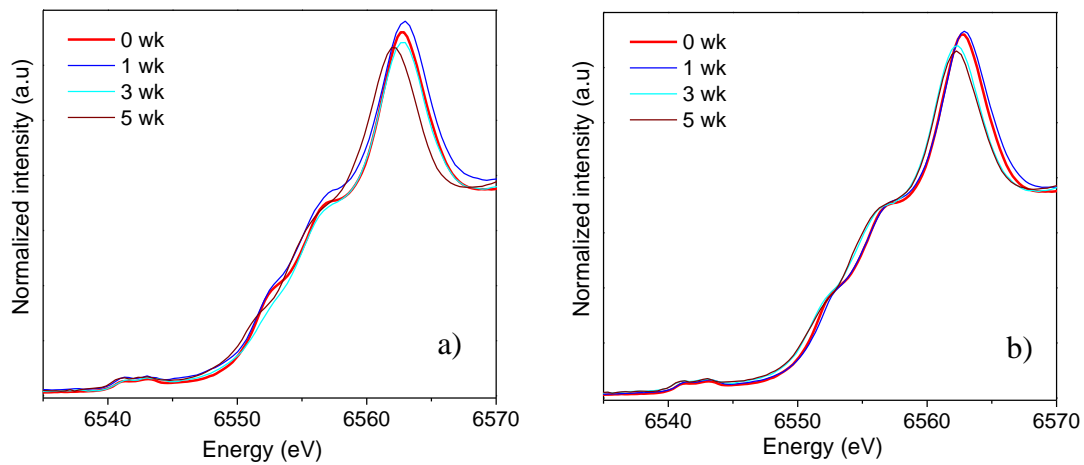

Figure SI-3. Mn *K*-edge XANES spectra of aged MNO: a) plate and b) octahedron.
